# Supplementary material for: A squaramide-based anionic hydrogen-bonded organic framework: enhancing sensing performance for pesticides by post-metallization with in situ imaging
Source: Royal Society of Chemistry journal article supplement (doi:10.1039/d3qi01054f), 2023-01-01
Supplement: d3qi01054f1.pdf [file d3qi01054f1.pdf]

Supporting Information for

**Squaramide-based Anionic Hydrogen-Bonded Organic Framework:  
Enhancing Sensing Performance for Pesticides by Post-Metallization  
with *In situ* Imaging**

Weiwei Jiang,<sup>[a]</sup> Hao Zheng,<sup>[a]</sup> Yuxuan Wu,<sup>[a]</sup> Pengyan Wu,<sup>\*[a]</sup> Liyuan Jing,<sup>[a]</sup>

Xingcheng Yuan,<sup>\*[a]</sup> Xichen Wang<sup>[a]</sup> and Jian Wang<sup>\*[a]</sup>

<sup>[a]</sup>Jiangsu Key Laboratory of Green Synthetic Chemistry for Functional Materials,  
School of Chemistry and Materials Science, Jiangsu Normal University, Xuzhou,  
221116, P. R. China.

## Materials and Methods:

All reagents and solvents in this work were of reagent grade and obtained commercially without further purification. 5,5'-((3,4-dioxocyclobut-1-ene-1,2-diyl)bis(azanediyl))diisophthalic acid (H<sub>4</sub>DBDA) was synthesized according to the published procedure (*Chem. Commun.*, 2016, 52, 8585). Eu(NO<sub>3</sub>)<sub>3</sub>·6H<sub>2</sub>O was purchased from Alfa Aesar. 2,6-dichloro-4-nitroaniline (DCN), *m*-nitrotoluene (*m*-NT), nitrobenzene (NB), aniline (A), phenol, chlorobenzene (CB), 2,4-dinitrotoluene (DNT), *p*-nitroaniline (*p*-NA), *o*-nitroaniline (*o*-NA), *m*-nitroaniline (*m*-NA), 3-nitropropionic acid (3-NPA), 1-chloro-3-nitrobenzene (CN), hexaconazole (HCZ), triclosan (TCS), 2,4-dichlorophenol (DCP), isoproturon (IPU) and diuron (DCMU) were provided from Shanghai Fourth Chemical Reagent Company (China). Stock solution (2×10<sup>-2</sup> M) of the ethanol solution DCN was prepared for further experiments.

## Instruments and spectroscopic measurements:

The elemental analyses of C, H and N were performed on a Vario EL III elemental analyzer. X-Ray powder diffraction (XRD) patterns was recorded on a Rigaku D/max-2400 X-ray powder diffractometer (Japan) using Cu-K $\alpha$  ( $\lambda = 1.5405$  Å) radiation. X-ray photoelectron spectroscopy (XPS) experiments were performed with a PHI QUANTUM2000 surface analysis instrument. The morphologies of the prepared samples were recorded by a Field Emission Scanning Electron Microscopy (SEM) of Hitachi SU8010. Samples were treated *via* Pt sputtering for 90 s before observation. FT-IR spectra were recorded as KBr pellets on JASCO FT/IR-430. Thermogravimetric analysis (TGA) was carried out at a ramp rate of 5 °C/min in a

nitrogen flow with a Mettler-Toledo TGA/SDTA851 instrument. Uv-*vis* spectra were measured on a JASCO V-530 spectrometer. Fluorescence spectra of the solution were obtained using the FP6500 spectrometer (JASCO). Both excitation and emission slit widths were 2.5 nm. Fluorescence measurements were carried out in a 1 cm quartzcuvette with stirring the suspension of Eu@DBDA.

**Crystal data of DBDA:**

$C_{24}H_{26}N_4O_{10}$ ,  $Mr = 530.49$ , Triclinic, space group  $P-1$ ,  $a = 8.713(2)$ ,  $b = 10.146(2)$ ,  $c = 14.257(3)$  Å,  $\alpha = 91.183(3)$ ,  $\beta = 104.081(3)$ ,  $\gamma = 101.059(3)$ ,  $V = 1196.8(4)$  Å<sup>3</sup>,  $Z = 2$ ,  $D_c = 1.472$  g cm<sup>-3</sup>,  $\mu(\text{Mo-K}\alpha) = 0.116$  mm<sup>-1</sup>,  $T = 296(2)$  K. 2026 unique reflections [ $R_{\text{int}} = 0.0215$ ]. Final  $R_1[\text{with } I > 2\sigma(I)] = 0.0419$ ,  $wR_2(\text{all data}) = 0.1106$ , GOOF = 1.021. CCDC number: 2206854.

**Crystallography:**

Intensities were collected on a Bruker SMART APEX CCD diffractometer with graphite monochromated Mo-K $\alpha$  ( $\lambda = 0.71073$  Å) using the SMART and SAINT programs. The structure was solved by direct methods and refined on  $F^2$  by full-matrix least-squares methods with SHELXTL *version 5.1*. Non-hydrogen atoms of the ligand backbones were refined anisotropically. Hydrogen atoms within the ligand backbones were fixed geometrically at calculated positions and allowed to ride on the parent non-hydrogen atoms.

**Table S1.** Selective bond distance (Å) and angle (°) in DBDA.

|                   |          |                   |          |
|-------------------|----------|-------------------|----------|
| O(1)–C(52)        | 1.279(4) | O(2)–C(58)        | 1.284(5) |
| O(3)–C(58)        | 1.226(5) | O(4)–C(52)        | 1.234(4) |
| O(5)–C(50)        | 1.220(4) | O(6)–C(68)        | 1.229(4) |
| O(14)–C(81)       | 1.288(5) | O(15)–C(81)       | 1.230(4) |
| O(18)–C(83)       | 1.253(4) | O(20)–C(83)       | 1.245(5) |
| N(1)–C(57)        | 1.325(5) | N(1)–C(34)        | 1.416(4) |
| N(2)–C(36)        | 1.339(5) | N(2)–C(55)        | 1.417(4) |
| C(7)–C(40)        | 1.382(5) | C(7)–C(33)        | 1.388(5) |
| C(7)–C(83)        | 1.510(5) | C(10)–C(39)       | 1.379(5) |
| C(10)–C(35)       | 1.379(5) | C(10)–C(81)       | 1.480(5) |
| C(12)–C(55)       | 1.390(5) | C(12)–C(15)       | 1.392(5) |
| C(15)–C(35)       | 1.385(5) | C(15)–C(52)       | 1.491(5) |
| C(30)–C(33)       | 1.380(5) | C(30)–C(46)       | 1.383(5) |
| C(30)–C(58)       | 1.489(5) | C(34)–C(46)       | 1.380(5) |
| C(34)–C(40)       | 1.381(5) | C(36)–C(57)       | 1.415(5) |
| C(36)–C(50)       | 1.484(6) | C(39)–C(55)       | 1.373(5) |
| C(50)–C(68)       | 1.456(6) | C(57)–C(68)       | 1.452(6) |
| C(71)–N(4)        | 1.471(5) | N(4)–C(73)        | 1.458(5) |
| C(90)–N(3)        | 1.454(5) | N(3)–C(79)        | 1.443(6) |
| C(57)–N(1)–C(34)  | 125.5(3) | C(36)–N(2)–C(55)  | 126.6(3) |
| C(40)–C(7)–C(33)  | 118.2(4) | C(40)–C(7)–C(83)  | 122.2(4) |
| C(33)–C(7)–C(83)  | 119.7(4) | C(39)–C(10)–C(35) | 119.6(4) |
| C(39)–C(10)–C(81) | 119.8(4) | C(35)–C(10)–C(81) | 120.6(4) |
| C(55)–C(12)–C(15) | 120.8(4) | C(35)–C(15)–C(12) | 118.6(4) |
| C(35)–C(15)–C(52) | 118.2(4) | C(12)–C(15)–C(52) | 123.2(4) |
| C(33)–C(30)–C(46) | 119.3(4) | C(33)–C(30)–C(58) | 119.9(4) |
| C(46)–C(30)–C(58) | 120.8(4) | C(30)–C(33)–C(7)  | 121.2(4) |
| C(46)–C(34)–C(40) | 119.2(4) | C(46)–C(34)–N(1)  | 121.3(4) |

---

|                   |          |                   |          |
|-------------------|----------|-------------------|----------|
| C(40)–C(34)–N(1)  | 119.4(4) | C(10)–C(35)–C(15) | 120.9(4) |
| N(2)–C(36)–C(57)  | 130.6(4) | N(2)–C(36)–C(50)  | 139.2(4) |
| C(57)–C(36)–C(50) | 90.2(3)  | C(55)–C(39)–C(10) | 120.9(4) |
| C(34)–C(40)–C(7)  | 121.5(4) | C(34)–C(46)–C(30) | 120.5(4) |
| O(5)–C(50)–C(68)  | 133.7(4) | O(5)–C(50)–C(36)  | 137.7(4) |
| C(68)–C(50)–C(36) | 88.6(3)  | O(4)–C(52)–O(1)   | 123.7(4) |
| O(4)–C(52)–C(15)  | 120.6(4) | O(1)–C(52)–C(15)  | 115.7(4) |
| C(39)–C(55)–C(12) | 119.1(3) | C(39)–C(55)–N(2)  | 122.6(4) |
| C(12)–C(55)–N(2)  | 118.2(4) | N(1)–C(57)–C(36)  | 133.2(4) |
| N(1)–C(57)–C(68)  | 135.3(4) | C(36)–C(57)–C(68) | 91.4(3)  |
| O(3)–C(58)–O(2)   | 122.7(4) | O(3)–C(58)–C(30)  | 119.4(4) |
| O(2)–C(58)–C(30)  | 117.9(4) | O(6)–C(68)–C(57)  | 136.2(4) |
| O(6)–C(68)–C(50)  | 133.9(4) | C(57)–C(68)–C(50) | 89.8(3)  |
| O(15)–C(81)–O(14) | 123.3(4) | O(15)–C(81)–C(10) | 120.0(4) |
| O(14)–C(81)–C(10) | 116.7(4) | O(20)–C(83)–O(18) | 124.1(4) |
| O(20)–C(83)–C(7)  | 118.3(4) | O(18)–C(83)–C(7)  | 117.6(4) |
| C(73)–N(4)–C(71)  | 114.2(4) | C(79)–N(3)–C(90)  | 113.5(4) |

---

**Figure S1.** View of the asymmetric unit of DBDA.

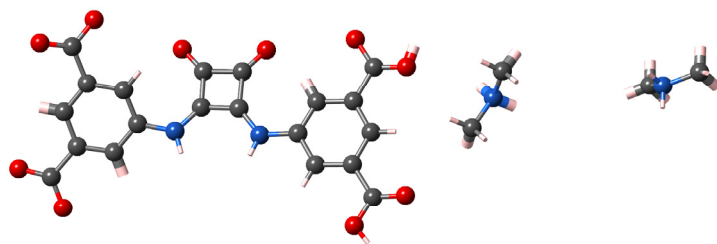

**Figure S2** The view of the packing structure of DBDA along *a* direction and *b* direction.

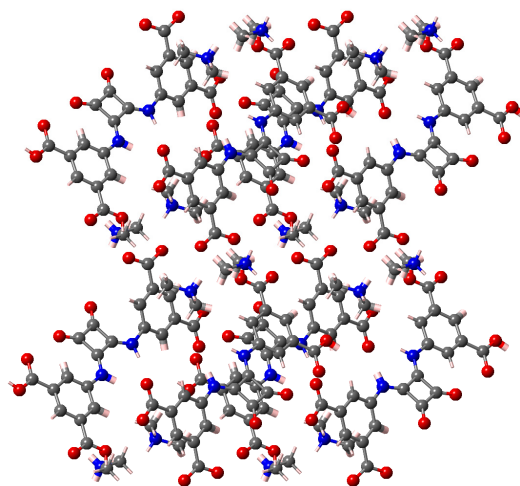

*a* axis

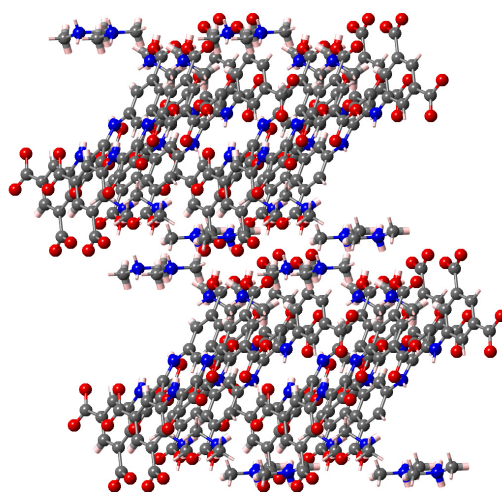

*b* axis



**Figure S3.** TGA traces of DBDA and Eu@DBDA ranging from room temperature to 800 °C.

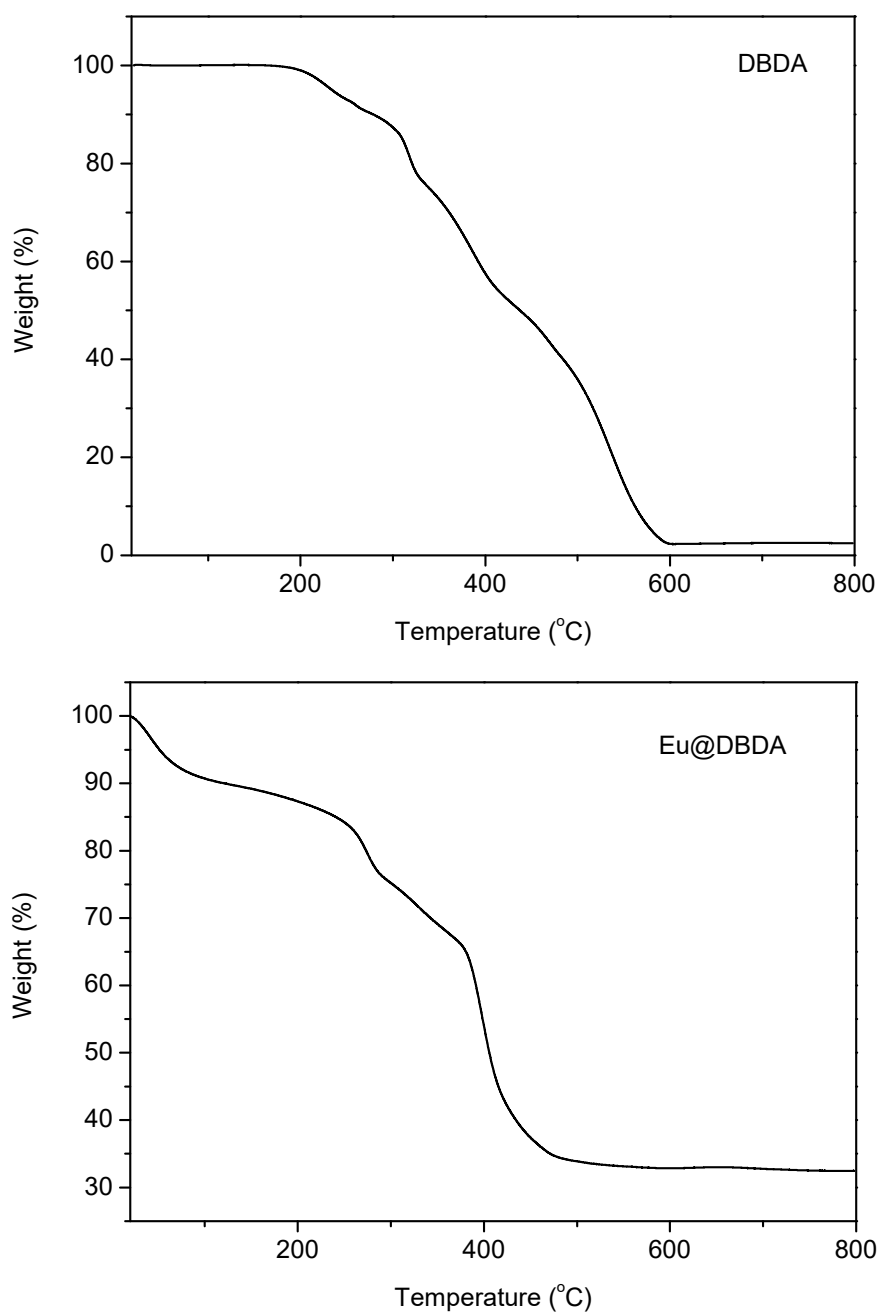

**Figure S4.** Luminescence spectra of DBDA (black) and Eu@DBDA (red).

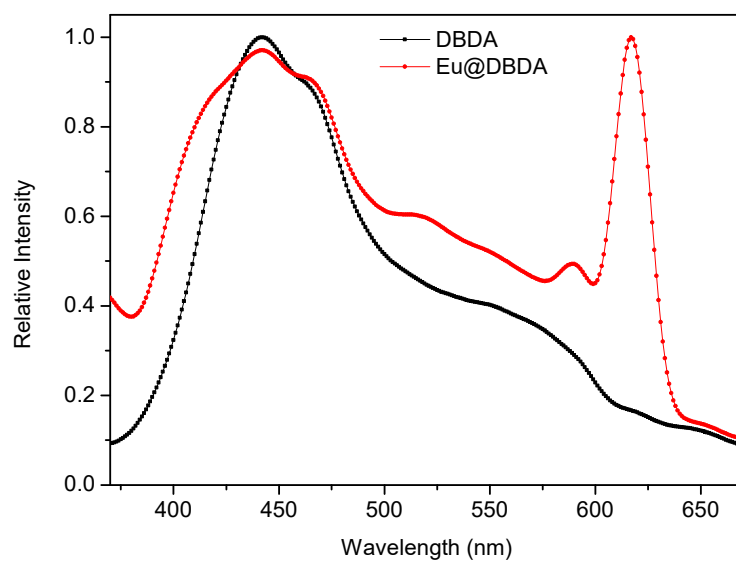

**Figure S5.** Families of various fluorescence spectra of Eu@DBDA in ethanol solution upon the addition of 0.38 mM of different selected analytes.

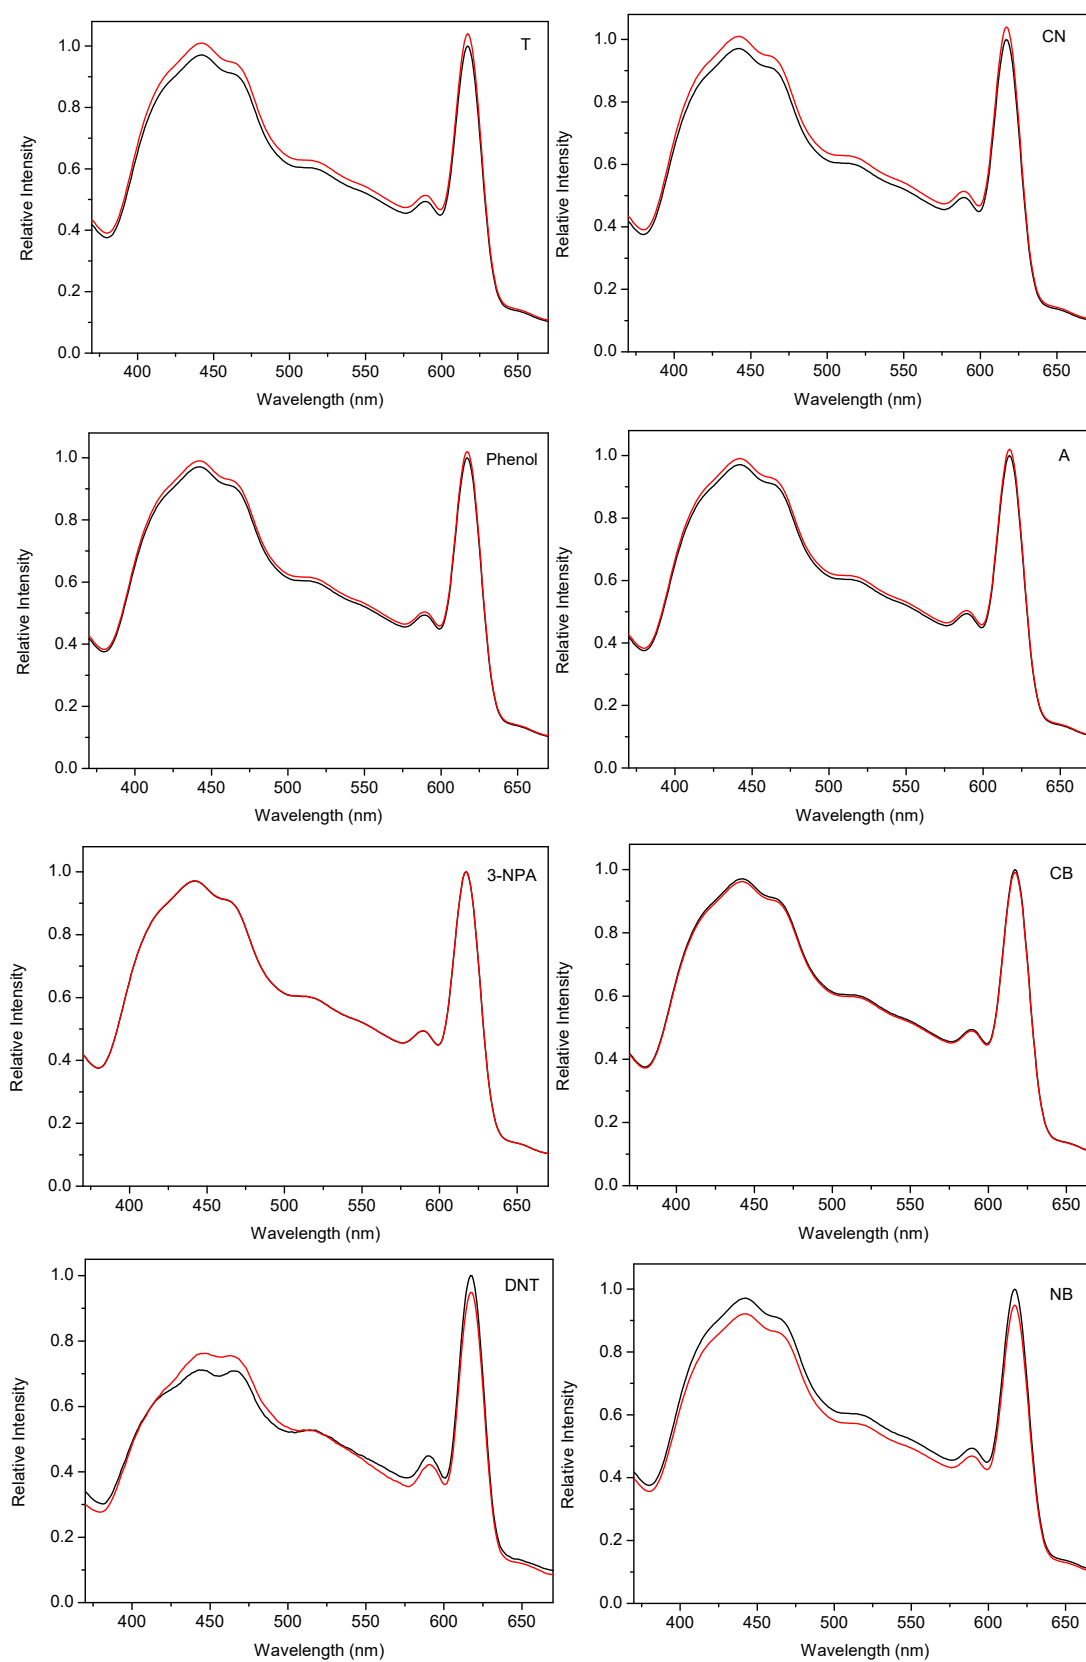

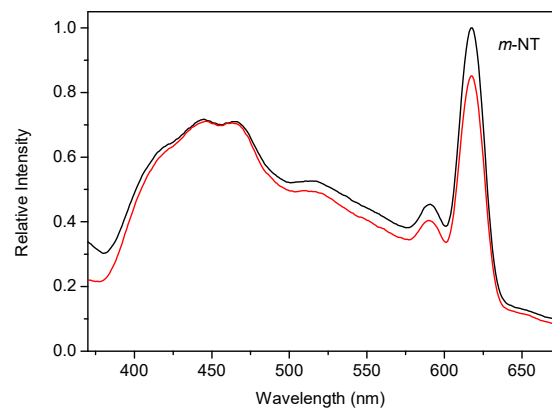

**Figure S6.** XPS spectra of DBDA and Eu@DBDA.

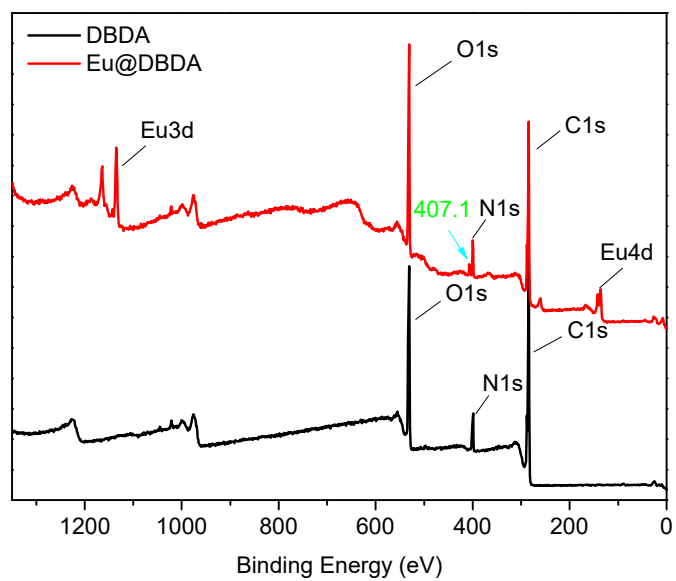

**Figure S7.** The fluorescence titration data of an EtOH solution of *p*-NA to the suspension of Eu@DBDA.

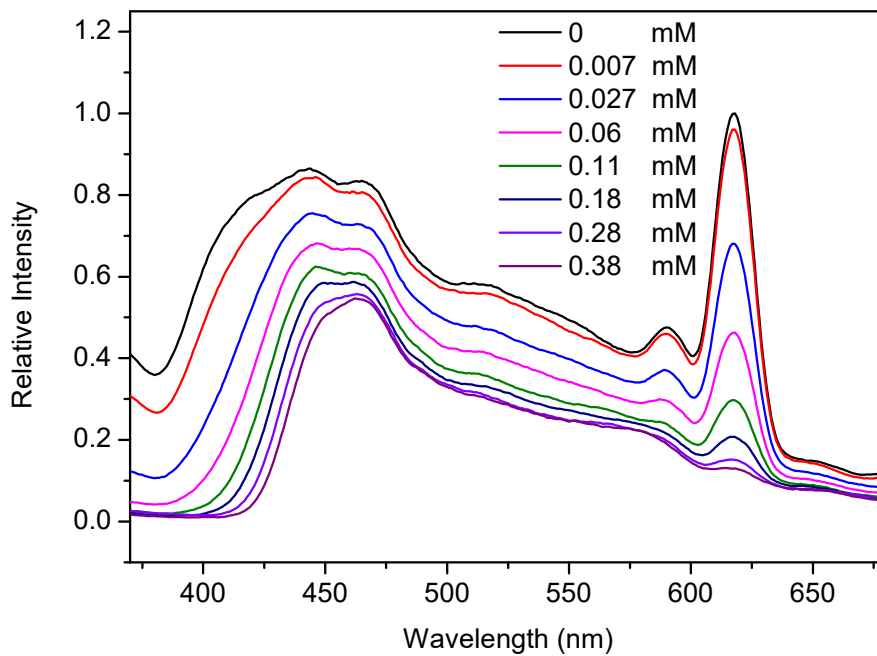

**Scheme S1.** Molecular structure of selected analysts.

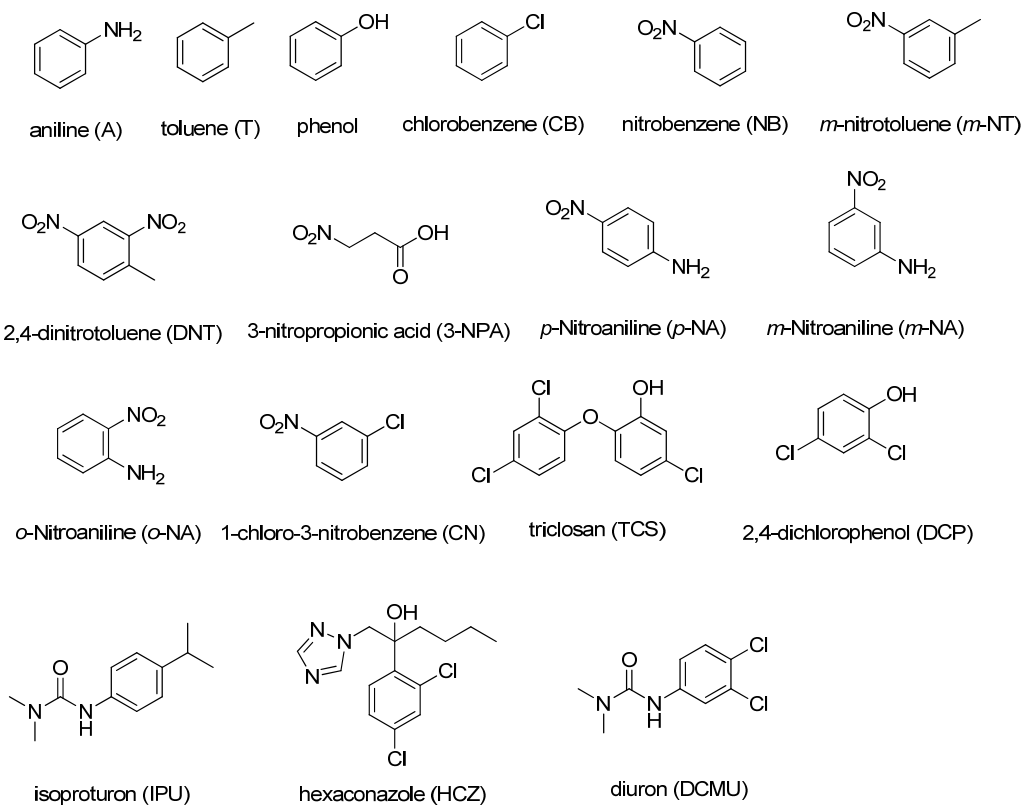

**Table S2.** Comparison of literature reports for MOFs as sensors of DCN.

| Entry | Materials                                                                                                   | LOD ( $\mu\text{M}$ ) | Ref.             |
|-------|-------------------------------------------------------------------------------------------------------------|-----------------------|------------------|
| 1     | $[\text{Eu}_2(\text{dtztp})(\text{OH})_2(\text{DMF})(\text{H}_2\text{O})_{2.5}] \cdot 2\text{H}_2\text{O}$  | 7.32                  | S1               |
| 2     | $[\text{Zn}_2(\text{bpdc})_2(\text{BPyTPE})]$                                                               | 0.18                  | S2               |
| 3     | Mg-APDA                                                                                                     | 0.2                   | S3               |
| 4     | $[\text{Ag}(\text{CIP}^-)]$                                                                                 | 0.18                  | S4               |
| 5     | $[\text{Cd}_2(\text{HDDB})(\text{bimpy})(\text{NMP})(\text{H}_2\text{O})] \cdot 3\text{H}_2\text{O}$        | 0.22                  | S5               |
| 6     | 1a                                                                                                          | 3.54                  | S6               |
| 7     | $[\text{Cd}(\text{tptc})_{0.5}(\text{phen})]$                                                               | 0.1                   | S7               |
| 8     | $[\text{Zn}_3(\text{DDB})(\text{DPE})]$                                                                     | 0.27                  | S8               |
| 9     | $[\text{Cd}(\text{tptc})_{0.5}(\text{bpy})]_n$                                                              | 0.68                  | S9               |
| 10    | kgd-M1@ACPs                                                                                                 | 0.09                  | S10              |
| 11    | $[\text{Zn}_2(\text{L})_2(\text{TPA})] \cdot 2\text{H}_2\text{O}$                                           | 1.90                  | S11              |
| 12    | $\{[\text{Zn}(\text{PA}^{2-})(\text{dmbpy})](\text{DMF})\}_n$                                               | 1.81                  | S12              |
| 13    | $[(\text{CH}_3)_2\text{NH}_2]_2[\text{Li}(\text{TCA})] \cdot 0.5\text{DMF} \cdot \text{H}_2\text{O}$        | 0.62                  | S13              |
| 14    | $\{\text{Zn}_4(\text{TPOM})(1,4\text{-NDC})_4\}_n$                                                          | 0.18                  | S14              |
| 15    | $[\text{Cd}_3(\text{CBCD})_2(\text{DMA})_4(\text{H}_2\text{O})_2] \cdot 10\text{DMA}$                       | 0.08                  | S15              |
| 16    | $\{[\text{Tb}_4(\text{BTDI})_3(\text{H}_2\text{O})_4] \cdot 4\text{H}_2\text{O} \cdot \text{solvents}\}_n$  | 0.34                  | S16              |
| 17    | $\text{Tb}_3(\text{HDDB})(\text{DDB})(\text{H}_2\text{O})_6] \cdot \text{H}_2\text{O}$                      | 0.05                  | S17              |
| 18    | $(\text{H}_3\text{O})[\text{Zn}_2\text{L}(\text{H}_2\text{O})] \cdot 3\text{NMP} \cdot 6\text{H}_2\text{O}$ | 2.57                  | S18              |
| 20    | Eu@DBDA                                                                                                     | 0.13                  | <b>This work</b> |



## Reference:

- S1. G.-D. Wang, Y.-Z. Li, W.-J. Shi, B. Zhang, L. Hou and Y.-Y. Wang, *Sens. Actuators B Chem.*, 2021, **331**, 129377.
- S2. C.-L. Tao, B. Chen, X.-G. Liu, L.-J. Zhou, X.-L. Zhu, J. Cao, Z.-G. Gu, Z. Zhao, L. Shen and B. Tang, *Chem. Comm.*, 2017, **53**, 9975-9978.
- S3. N. Xu, Q.-H. Zhang, B.-S. Hou, Q. Cheng and G.-A. Zhang, *Inorg. Chem.*, 2018, **57**, 13330-13340.
- S4. D.-D. Feng, Y.-D. Zhao, X.-Q. Wang, D.-D. Fang, J. Tang, L.-M. Fan and J. Yang, *Dalton Trans.*, 2019, **48**, 10892-10900.
- S5. D.-D. Feng, J. Tang, J. Yang, X.-H. Ma, C.-Z. Fan and X.-Q. Wang, *J. Mol. Struct.*, 2020, **1221**, 128841.
- S6. M. Hoshi, N. Kaneko, R. Nishiyabu and Y. Kubo, *J. Mater. Chem. C*, 2018, **6**, 11052-11062.
- S7. L.-M. Fan, Z.-J. Liu, Y.-J. Zhang, F. Wang, D.-S. Zhao, J.-D. Yang and X.-T. Zhang, *New J. Chem.*, 2019, **43**, 13349-13356.
- S8. X.-Q. Wang, D.-D. Feng, J. Tang, Y.-D. Zhao, J. Li, J. Yang, C. K. Kim and F. Su, *Dalton Trans.*, 2019, **48**, 16776-16785.
- S9. L.-M. Fan, F. Wang, D.-S. Zhao, X.-H. Sun, H.-T. Chen, H.-W. Wang and X.-T. Zhang, *Spectrochim. Acta A Mol. Biomol. Spectrosc.*, 2020, **239**, 118467.
- S10. W.-W. Jia, R.-Q. Fan, J. Zhang, Z.-Q. Geng, P.-X. Li, J.-K. Sun, S. Gai, K. Zhu, X. Jiang and Y.-L. Yang, *Food Chem.*, 2022, **377**, 132054 .
- S11. X.-Y. Guo, Z.-P. Dong, F. Zhao, Z.-L. Liu and Y.-Q. Wang, *New J. Chem.*, 2019, **43**, 2353-2361.
- S12. H. Kaur, S. Walia, A. Karmakar, V. Krishnan and R. R. Koner, *J. Environ. Chem. Eng.*, 2022, **10**, 106667.
- S13. N. Seal, R. Goswami, M. Singh, R. S. Pillai and S. Neogi, *Inorg. Chem. Front.*, 2021, **8**, 296-310.
- S14. G. Chakraborty, P. Das and S. K. Mandal, *ACS Appl. Mater. Interfaces*, 2018, **10**, 42406-42416.
- S15. N. Xu, Q.-H. Zhang and G.-A. Zhang, *Dalton Trans.*, 2019, **48**, 2683-2691.

- S16. Y. Li, B.-L. Chai, H. Xu, T.-F. Zheng, J.-L. Chen, S.-J. Liu and H.-R. Wen, *Inorg. Chem. Front.*, 2022, **9**, 1504-1513.
- S17. X.-Q. Wang, X.-H. Ma, D.-D. Feng, J. Tang, D. Wu, J. Yang and J.-J. Jiao, *Cryst. Growth Des.*, 2021, **21**, 2889-2897.
- S18. L. Di, Z.-Q. Xia, J. Li, Z.-X. Geng, C. Li, Y. Xing and Z.-X. Yang, *RSC Adv.*, 2019, **9**, 38469-38476.
